# Supplementary material for: First Detection and Genetic Characterization of New Equine Parvovirus Species Circulating among Horses in Korea
Source: MDPI journal article supplement (doi:10.3390/vetsci8110268), 2021-11-07

**Table S1.** Primer sets and PCR information for EqPV-CSF/EqCoPV detection.

| PCR                                  | Primer Sets | Sequences (5' → 3')     | Product Size, bp | Tm   | No. PCR Cycles | References |
|--------------------------------------|-------------|-------------------------|------------------|------|----------------|------------|
| EqPV-CSF detection (partial NS gene) | Forward     | CAAATGGACCAATGCAAGCAG   | 996              | 50°C | 40             | [16]       |
|                                      | Reverse     | ATGGTCCATAGTGACCAGTGTC  |                  |      |                |            |
| EqCoPV detection (partial VP gene)   | Forward     | GTGGACAGCCGAAGAGTGGA    | 522              | 50°C | 40             | [1]        |
|                                      | Reverse     | AGTCACTCGGCCATGGTGT     |                  |      |                |            |
| EqPV-CSF (complete CDS)              | EqPV 1F     | ATACCCCAACAGAAACAAGG    | 1145             | 56°C | 40             | MZ100069.1 |
|                                      | EqPV 1145R  | TGTCCTTCATCCCACCATCC    |                  |      |                |            |
|                                      | EqPV 940F   | GGAATGCTATTCTGGCTATGGTC | 1153             | 56°C | 40             |            |
|                                      | EqPV 2092R  | GTCTCTGGTGCTTTCTGTGC    |                  |      |                |            |
|                                      | EqPV 1922F  | ACCAGGACCAGACGCATATT    | 1148             | 56°C | 40             |            |
|                                      | EqPV 3069R  | ACGCATCCTGTGAAGGTACA    |                  |      |                |            |
|                                      | EqPV 2724F  | AGTTGTGAGAAACGCCTGCT    | 1551             | 56°C | 40             |            |
|                                      | EqPV 4274R  | TGCTGTGTCTTGGGTCTTG     |                  |      |                |            |
|                                      | EqPV 3939F  | GACAATCCATGGGCCAAACA    | 1111             | 56°C | 40             |            |
|                                      | EqPV 5049R  | CGGAGGTGAGGCTACATTCC    |                  |      |                |            |
| EqCoPV (complete CDS)                | EqCo 26F    | GCGTTGCAACAACCACAAAA    | 1236             | 56°C | 40             | MN181468.1 |
|                                      | EqCo 1261R  | TAGTGCTCCTTCATCCCACC    |                  |      |                |            |
|                                      | EqCo 617F   | CTTCGATCCTGGACAACCAT    | 1637             | 56°C | 40             |            |
|                                      | EqCo 2253R  | TAGCAGCCCTCCCAATGTAG    |                  |      |                |            |
|                                      | EqCo 2027F  | GGTCACAAAAAGGCACTGGT    | 1262             | 56°C | 40             |            |
|                                      | EqCo 3288R  | GCTAAGCCTCCAAGTTCAGC    |                  |      |                |            |
|                                      | EqCo 2910F  | CAACGATAACCGTGTGGACAG   | 1311             | 56°C | 40             |            |
|                                      | EqCo 4220R  | AGTAGTCCCCGTCCCTATGT    |                  |      |                |            |
|                                      | EqCo 3981F  | TACCAATGGAACCCCTCACA    | 1101             | 56°C | 40             |            |
|                                      | EqCo 5081R  | GTCTGTCTCTCATGGGCCAT    |                  |      |                |            |
|                                      | EqCo 4810F  | AATGGTACCAACACCAGGAC    | 289              | 60°C | 40             |            |
|                                      | EqCo 5098F  | TTATCTCATTCTTCTGGGTCTG  |                  |      |                |            |

Abbreviations: bp, base pair; CDS, coding sequences; PCR, polymerase chain reaction; NS, non-structural; Tm, melting temperature.

**Table S2.** Detailed information on clinical signs of horses in this study.

| Clinical Signs                         | Number of Horses |
|----------------------------------------|------------------|
| Colic                                  | 41               |
| Osteochondrosis                        | 8                |
| Diarrhea                               | 4                |
| Dystocia                               | 3                |
| Pneumonia                              | 3                |
| Wound                                  | 3                |
| Anorexia                               | 2                |
| Cachexia                               | 2                |
| Cellulitis                             | 2                |
| Equine Neonatal Maladjustment Syndrome | 2                |
| Hyperthermia                           | 2                |
| Limb deformity                         | 2                |
| Respiratory noise                      | 2                |
| Sesamoid bone fracture                 | 2                |
| Arthritis                              | 1                |
| Castration                             | 1                |
| Corneal ulcer                          | 1                |
| Dermatitis                             | 1                |
| Esophageal stricture                   | 1                |
| Guttural pouch empyema                 | 1                |
| Lameness                               | 1                |
| Laminitis                              | 1                |
| Strangles                              | 1                |
| Suspensory ligament rupture            | 1                |

**Figure S1.** Phylogenetic analysis based on a partial NS gene (872 bp) of EqPV-CSF. Newly identified Korean isolates are indicated by black diamonds. The Korean isolates were analyzed together with other members of genus *Copiparvovirus*.

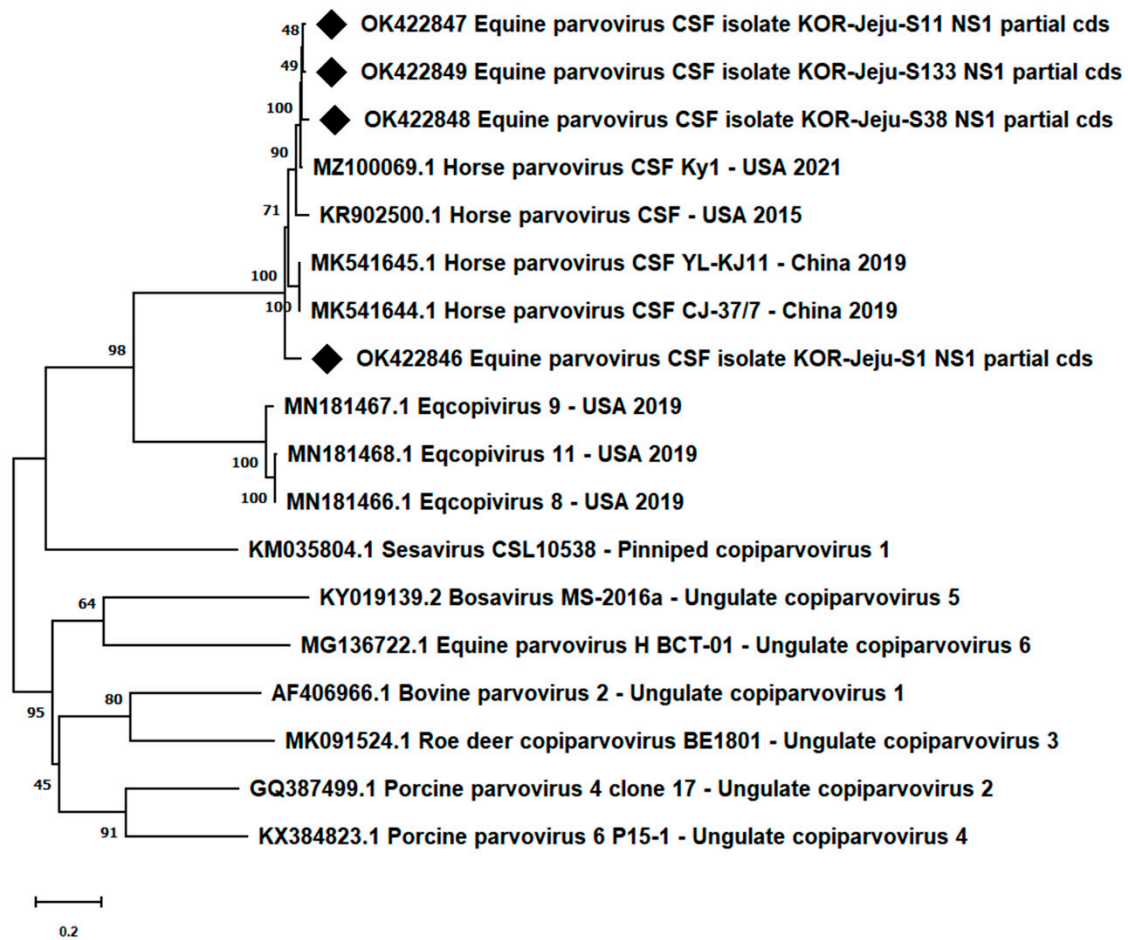

**Figure S2.** Phylogenetic analysis based on a partial VP gene (479 bp) of EqCoPV. Newly identified Korean isolates are indicated by black circles. The Korean isolates were analyzed together with other members of genus *Copiparvovirus*.

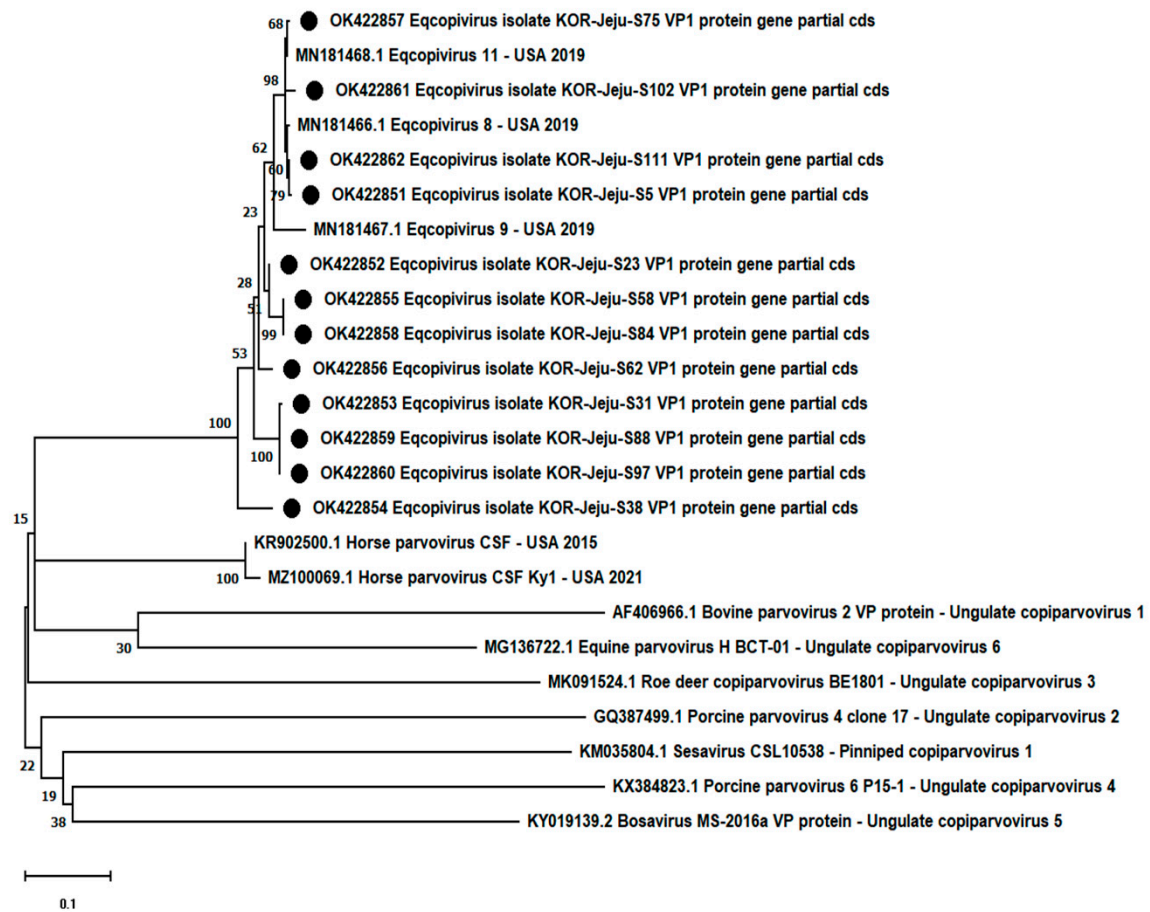

Supplement: s1 [file s1]
